# Supplementary material for: HuoXueTongFu Formula Alleviates Intraperitoneal Adhesion by Regulating Macrophage Polarization and the SOCS/JAK2/STAT/PPAR-γ Signalling Pathway
Source: Hindawi journal article supplement (doi:10.1155/2019/1769374), 2019-10-21
Supplement: f1 [file 1769374.f1.pdf]

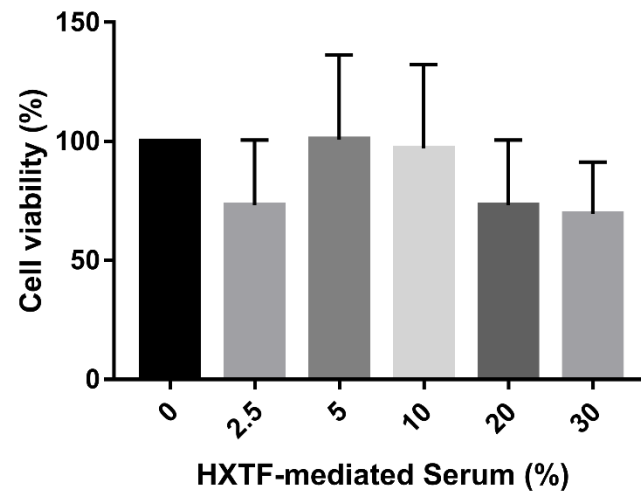

Figure S1: Effect of HuoXueTongFu Formula (HXTF) - medicated serum on the viability of RAW264.7 cells. Group without HXTF-mediated serum used 10% FBS. All values are expressed as mean  $\pm$  S.E. (n=3 experiments)
